# Supplementary material for: Sistema hormona de crecimiento/factor-I de crecimiento similar a la insulina y enfermedades del tejido conectivo: aspectos básicos e implicaciones clínicas
Source: Royal Society of Chemistry journal article supplement (doi:10.1039/d4cp00476k), 2005-01-01
Supplement: d4cp00476k1.pdf [file d4cp00476k1.pdf]

## Supplementary information for Covalent functionalization of germanene employing computational simulations

Pablo A. Denis<sup>a,\*</sup>, Jose A. S. Laranjeira<sup>b</sup>, and Julio R. Sambrano<sup>b,\*</sup>

*a*- Computational Nanotechnology, DETEMA, Facultad de Química, UDELAR, CC 1157, 11800 Montevideo, Uruguay.

*b* - Modeling and Molecular Simulation Group, Sao Paulo State University (UNESP), 17033-360 Bauru, SP, Brazil

[pablod@fq.edu.uy](mailto:pablod@fq.edu.uy)

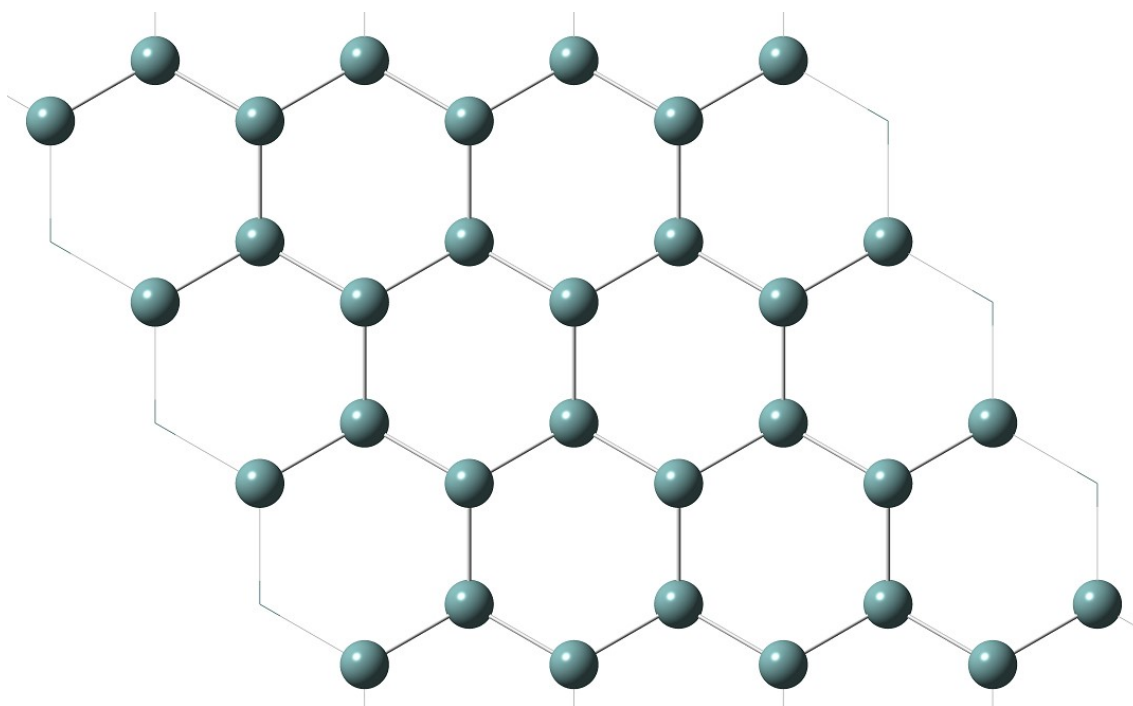

**Figure S1.** Optimized structure for germanene 4×4 unit cell employed in this study for the periodic boundary conditions calculations, at the M06-L/6-311G\* level of theory.

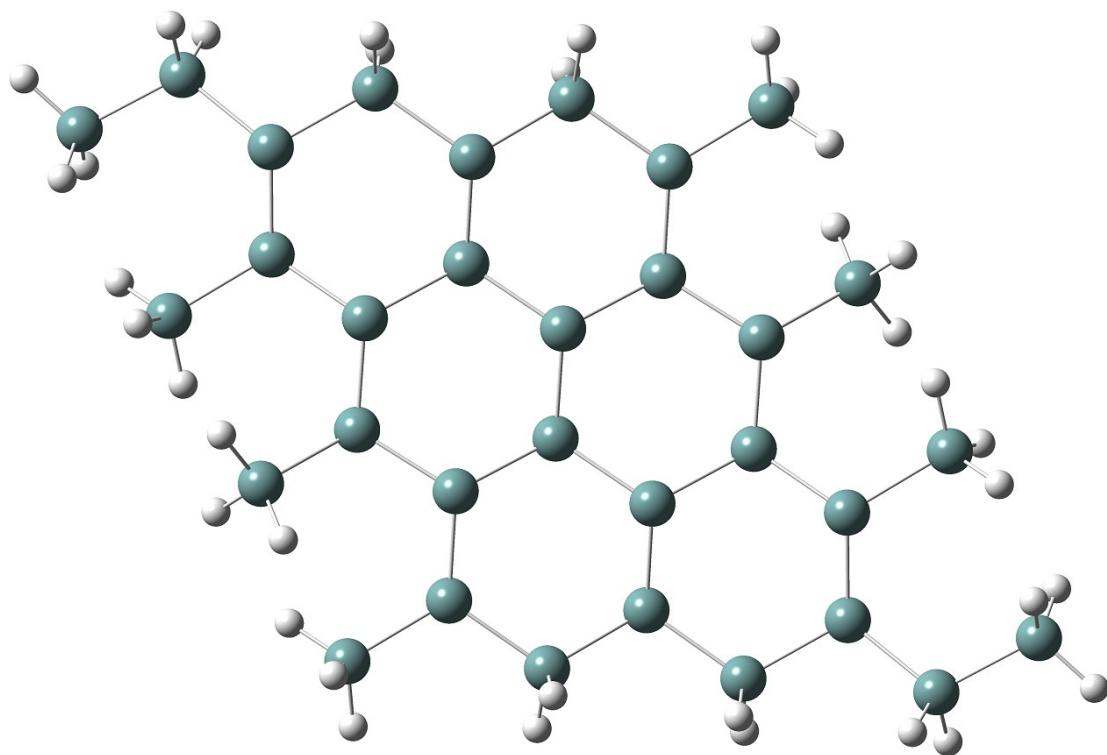

**Figure S2.** Optimized structure for germanene flake used to compute thermodynamic corrections, at the M06-L/6-311G\* level of theory.

**Table S1.** Ge-Ge bond distances determined at the M06-L/6-311G\* level of theory.<sup>a,b</sup>

|                               |      |
|-------------------------------|------|
| H                             | 2.48 |
| O <sup>c</sup>                | 3.13 |
| OH                            | 2.49 |
| S                             | 2.49 |
| Se                            | 2.50 |
| F                             | 2.48 |
| Cl                            | 2.49 |
| Br                            | 2.49 |
| CH <sub>3</sub>               | 2.49 |
| CF <sub>3</sub>               | 2.48 |
| NH <sup>c</sup>               | 3.09 |
| NH <sub>2</sub>               | 2.50 |
| SH                            | 2.49 |
| C <sub>6</sub> H <sub>5</sub> | 2.49 |
| C <sub>6</sub> H <sub>4</sub> | 2.51 |
| Azomethine-I                  | 2.49 |
| CCl <sub>2</sub>              | 2.56 |
| CBr <sub>2</sub>              | 2.56 |

- a) The Ge-Ge bond distance in monolayer germanene is 2.42 Å.
- b) For H, OH, F, Cl, Br, CH<sub>3</sub>, CF<sub>3</sub>, NH<sub>2</sub> and C<sub>6</sub>H<sub>5</sub>, The distance reported corresponds to the average of the three Ge-Ge bond distances that the reacting Ge atom forms with its three neighbors. In the case of O, S, Se, C<sub>6</sub>H<sub>4</sub>, azomethine, CCl<sub>2</sub> and CBr<sub>2</sub> the Ge-Ge distance reported is the one between the Ge atoms that react with the functional groups, as they are bonded to two Ge atoms.
- c) Only for the addition of O and NH the Ge-Ge bond is broken.

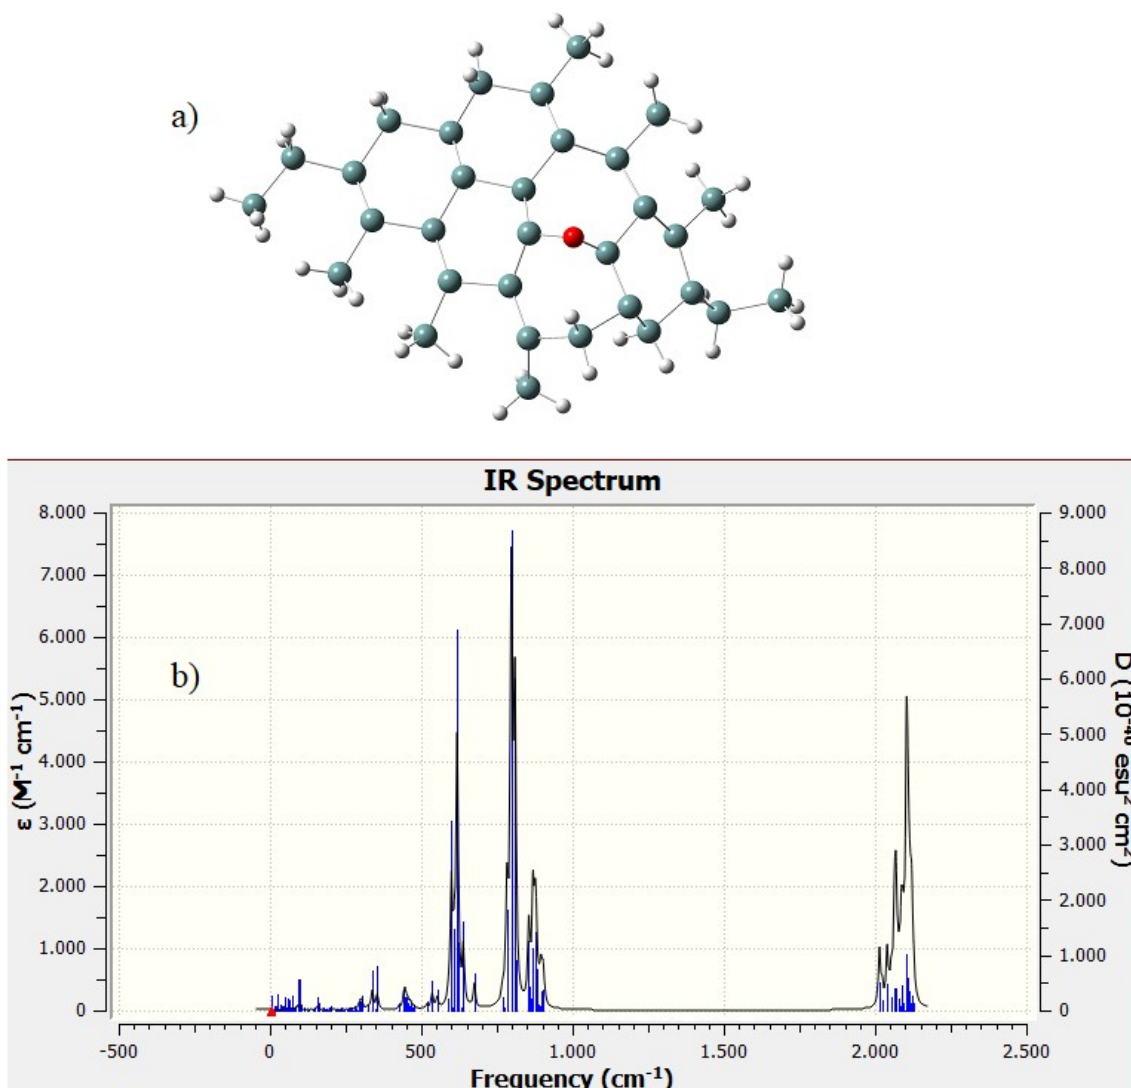

**Figure S3.** a ) Optimized structure for germanene flake functionalized with an oxygen atom used to compute thermodynamic corrections, at the M06-L/6-311G\* level of theory, b) Vibrational analysis.

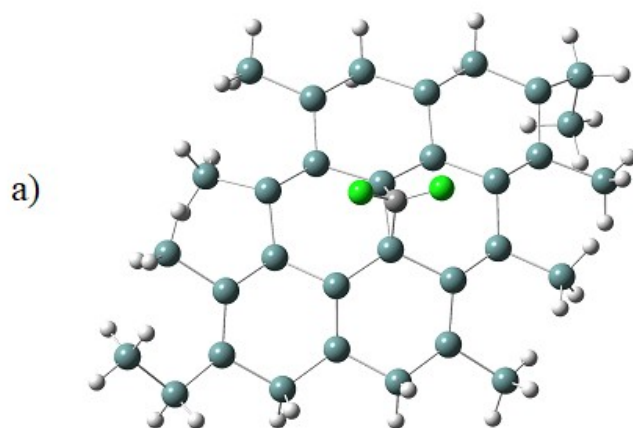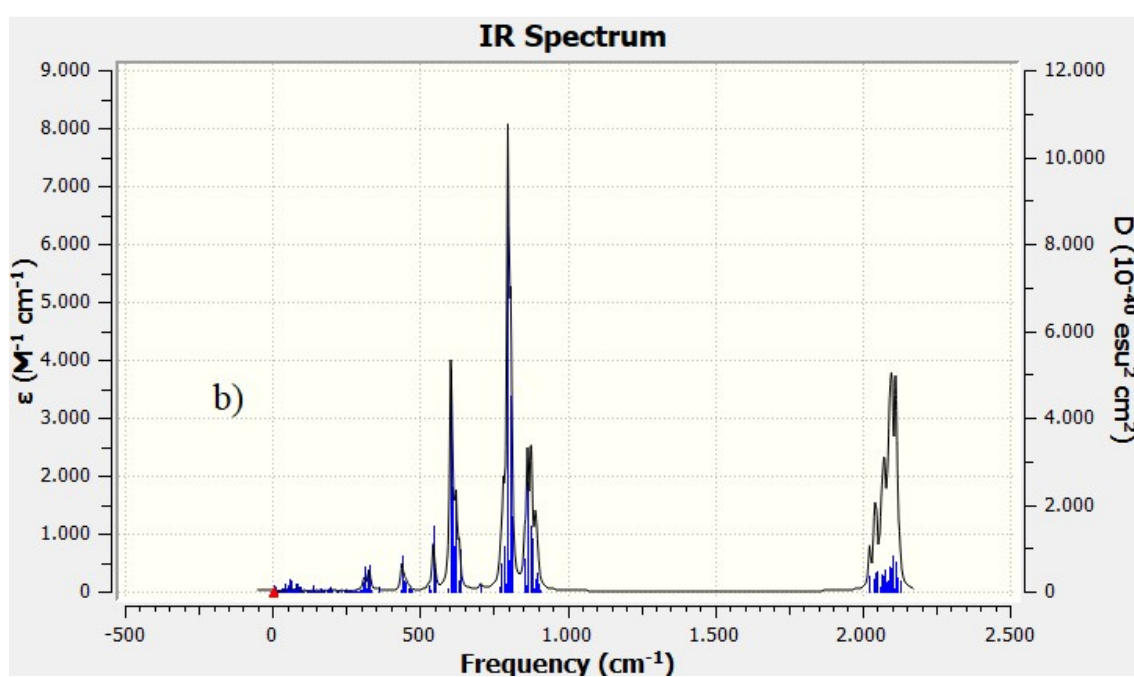

**Figure S4.** a ) Optimized structure for germanene flake functionalized with an oxygen atom used to compute thermodynamic corrections, at the M06-L/6-311G\* level of theory, b) Vibrational analysis.

**Anex I: Vibrational frequency analysis of O-05% functionalized germanene (six atoms unit cell, periodic calculation).**

|                |    |              |       |       |              |       |       |              |       |       |
|----------------|----|--------------|-------|-------|--------------|-------|-------|--------------|-------|-------|
|                |    | 1            |       |       | 2            |       |       | 3            |       |       |
|                |    | A            |       |       | A            |       |       | A            |       |       |
| Frequencies -- |    | 36.0372      |       |       | 39.5823      |       |       | 104.2246     |       |       |
| Red. masses -- |    | 73.8660      |       |       | 58.2153      |       |       | 50.5330      |       |       |
| Frc consts --  |    | 0.0565       |       |       | 0.0537       |       |       | 0.3234       |       |       |
| IR Inten       | -- | 5430675.1951 |       |       | 331172.3340  |       |       | 1773508.4142 |       |       |
| Atom AN        |    | X            | Y     | Z     | X            | Y     | Z     | X            | Y     | Z     |
| 1              | 32 | -0.50        | 0.00  | -0.01 | 0.01         | 0.05  | -0.42 | 0.00         | 0.09  | 0.21  |
| 2              | 32 | 0.50         | 0.00  | 0.01  | 0.00         | 0.03  | 0.42  | 0.00         | -0.04 | 0.50  |
| 3              | 32 | 0.50         | 0.00  | 0.01  | 0.00         | 0.03  | 0.43  | 0.00         | 0.04  | -0.49 |
| 4              | 32 | -0.50        | 0.00  | -0.01 | 0.01         | 0.04  | -0.43 | -0.01        | -0.09 | -0.21 |
| 5              | 8  | -0.02        | 0.00  | 0.00  | -0.01        | -0.37 | 0.00  | 0.05         | -0.05 | 0.44  |
| 6              | 8  | -0.02        | -0.01 | 0.00  | 0.00         | -0.37 | 0.00  | 0.04         | 0.05  | -0.44 |
| 7              | -2 | 0.00         | 0.00  | 0.00  | 0.00         | 0.00  | 0.00  | 0.00         | 0.00  | 0.00  |
| 8              | -2 | 0.00         | 0.00  | 0.00  | 0.00         | 0.00  | 0.00  | 0.00         | 0.00  | 0.00  |
|                |    | 4            |       |       | 5            |       |       | 6            |       |       |
|                |    | A            |       |       | A            |       |       | A            |       |       |
| Frequencies -- |    | 125.7300     |       |       | 130.1549     |       |       | 161.9294     |       |       |
| Red. masses -- |    | 17.6890      |       |       | 60.7459      |       |       | 18.0967      |       |       |
| Frc consts --  |    | 0.1648       |       |       | 0.6063       |       |       | 0.2796       |       |       |
| IR Inten       | -- | *****        |       |       | 1774456.8940 |       |       | *****        |       |       |
| Atom AN        |    | X            | Y     | Z     | X            | Y     | Z     | X            | Y     | Z     |
| 1              | 32 | 0.08         | 0.00  | 0.06  | -0.03        | 0.01  | 0.56  | 0.10         | 0.00  | 0.00  |
| 2              | 32 | 0.07         | -0.01 | -0.02 | -0.03        | -0.06 | -0.28 | 0.09         | 0.00  | 0.00  |
| 3              | 32 | 0.07         | 0.01  | 0.01  | -0.02        | 0.06  | 0.27  | -0.10        | 0.00  | 0.00  |
| 4              | 32 | 0.08         | 0.00  | -0.05 | -0.02        | -0.01 | -0.55 | -0.10        | 0.00  | 0.00  |
| 5              | 8  | -0.69        | 0.02  | 0.03  | 0.20         | 0.19  | 0.18  | 0.70         | 0.00  | 0.00  |
| 6              | 8  | -0.70        | -0.01 | -0.02 | 0.23         | -0.18 | -0.18 | -0.69        | 0.00  | 0.00  |
| 7              | -2 | 0.00         | 0.00  | 0.00  | 0.00         | 0.00  | 0.00  | 0.00         | 0.00  | 0.00  |
| 8              | -2 | 0.00         | 0.00  | 0.00  | 0.00         | 0.00  | 0.00  | 0.00         | 0.00  | 0.00  |
|                |    | 7            |       |       | 8            |       |       | 9            |       |       |
|                |    | A            |       |       | A            |       |       | A            |       |       |
| Frequencies -- |    | 187.2892     |       |       | 239.2073     |       |       | 260.8141     |       |       |
| Red. masses -- |    | 56.3748      |       |       | 59.2371      |       |       | 62.2960      |       |       |
| Frc consts --  |    | 1.1651       |       |       | 1.9971       |       |       | 2.4967       |       |       |
| IR Inten       | -- | 6226452.6265 |       |       | 1031397.0583 |       |       | 2727601.1652 |       |       |
| Atom AN        |    | X            | Y     | Z     | X            | Y     | Z     | X            | Y     | Z     |
| 1              | 32 | 0.00         | 0.41  | 0.00  | 0.00         | -0.43 | 0.03  | 0.00         | 0.44  | -0.14 |
| 2              | 32 | 0.00         | 0.42  | -0.03 | 0.00         | 0.42  | 0.04  | 0.00         | -0.43 | -0.12 |
| 3              | 32 | 0.00         | -0.42 | 0.03  | 0.00         | 0.43  | 0.05  | 0.00         | 0.42  | 0.12  |
| 4              | 32 | 0.00         | -0.41 | 0.00  | 0.00         | -0.44 | 0.04  | 0.00         | -0.43 | 0.13  |
| 5              | 8  | 0.00         | 0.39  | -0.03 | -0.01        | 0.01  | -0.35 | 0.00         | -0.01 | 0.32  |
| 6              | 8  | 0.00         | -0.39 | 0.03  | 0.00         | 0.01  | -0.36 | 0.00         | 0.01  | -0.31 |
| 7              | -2 | 0.00         | 0.00  | 0.00  | 0.00         | 0.00  | 0.00  | 0.00         | 0.00  | 0.00  |
| 8              | -2 | 0.00         | 0.00  | 0.00  | 0.00         | 0.00  | 0.00  | 0.00         | 0.00  | 0.00  |
|                |    | 10           |       |       | 11           |       |       | 12           |       |       |







|                |         |          |       |       |  |              |       |       |       |              |       |
|----------------|---------|----------|-------|-------|--|--------------|-------|-------|-------|--------------|-------|
|                |         | 10       |       | 11    |  | 12           |       |       |       |              |       |
|                |         | A        |       | A     |  | A            |       |       |       |              |       |
| Frequencies -- |         | 291.6116 |       |       |  | 297.6666     |       |       |       | 303.7569     |       |
| Red. masses -- |         | 71.2950  |       |       |  | 62.1181      |       |       |       | 73.9207      |       |
| Frc consts --  |         | 3.5721   |       |       |  | 3.2429       |       |       |       | 4.0185       |       |
| IR Inten       | --***** |          |       |       |  | 2586975.0944 |       |       |       | 3632519.6884 |       |
| Atom AN        |         | X        | Y     | Z     |  | X            | Y     | Z     | X     | Y            | Z     |
| 1              | 32      | 0.49     | 0.00  | 0.00  |  | 0.00         | 0.41  | -0.08 | 0.50  | 0.00         | 0.00  |
| 2              | 32      | 0.48     | 0.00  | 0.00  |  | 0.00         | -0.42 | -0.08 | -0.50 | 0.00         | 0.00  |
| 3              | 32      | -0.48    | 0.00  | 0.00  |  | 0.00         | 0.42  | 0.08  | 0.50  | 0.00         | 0.00  |
| 4              | 32      | -0.49    | 0.00  | 0.00  |  | 0.00         | -0.41 | 0.08  | -0.50 | 0.00         | 0.00  |
| 5              | 16      | -0.18    | 0.00  | 0.00  |  | 0.00         | 0.01  | 0.38  | 0.00  | 0.00         | 0.00  |
| 6              | 16      | 0.18     | 0.00  | 0.00  |  | 0.00         | -0.01 | -0.37 | 0.00  | 0.00         | 0.00  |
| 7              | -2      | 0.00     | 0.00  | 0.00  |  | 0.00         | 0.00  | 0.00  | 0.00  | 0.00         | 0.00  |
| 8              | -2      | 0.00     | 0.00  | 0.00  |  | 0.00         | 0.00  | 0.00  | 0.00  | 0.00         | 0.00  |
|                |         | 13       |       | 14    |  | 15           |       |       |       |              |       |
|                |         | A        |       | A     |  | A            |       |       |       |              |       |
| Frequencies -- |         | 312.4867 |       |       |  | 446.4558     |       |       |       | 449.0734     |       |
| Red. masses -- |         | 42.4075  |       |       |  | 39.6903      |       |       |       | 37.4196      |       |
| Frc consts --  |         | 2.4398   |       |       |  | 4.6611       |       |       |       | 4.4462       |       |
| IR Inten       | --***** |          |       |       |  | 4284330.1700 |       |       |       | 2518535.1178 |       |
| Atom AN        |         | X        | Y     | Z     |  | X            | Y     | Z     | X     | Y            | Z     |
| 1              | 32      | 0.00     | -0.22 | -0.13 |  | 0.00         | -0.15 | -0.15 | 0.00  | 0.11         | 0.14  |
| 2              | 32      | 0.00     | -0.21 | 0.13  |  | 0.00         | 0.15  | -0.15 | 0.00  | -0.11        | 0.15  |
| 3              | 32      | 0.00     | 0.21  | -0.13 |  | 0.00         | -0.16 | 0.15  | 0.00  | -0.11        | 0.14  |
| 4              | 32      | 0.00     | 0.22  | 0.13  |  | 0.00         | 0.15  | 0.15  | 0.00  | 0.11         | 0.14  |
| 5              | 16      | 0.00     | 0.61  | 0.00  |  | 0.00         | 0.00  | 0.63  | 0.00  | 0.00         | -0.67 |
| 6              | 16      | 0.00     | -0.61 | 0.00  |  | 0.00         | 0.00  | -0.65 | 0.00  | 0.00         | -0.65 |
| 7              | -2      | 0.00     | 0.00  | 0.00  |  | 0.00         | 0.00  | 0.00  | 0.00  | 0.00         | 0.00  |
| 8              | -2      | 0.00     | 0.00  | 0.00  |  | 0.00         | 0.00  | 0.00  | 0.00  | 0.00         | 0.00  |
